# Supplementary material
Source: Research Square preprint supplement (doi:10.21203/rs.3.rs-9589252/v1)
Supplement: Supplementary file 1 [file f19bca8d225bbbd4c3cb502a.docx]

**Supplemental Information**

**Supplementary Table 1:** *4Litho chemical properties of autoclaved lunar (LHS-1) and martian (MGS-1) regolith simulant made by ActLabs. Chemical analysis was completed using either Fusion Inductively Coupled Plasma (FUS-ICP) or Fusion Mass Spectrometry (FUS-MS) methods. Bolded martian values show measurements with elevated chemical composition compared to lunar.*

| **Measurement** | **Analysis method** | **Detection limit** | **Lunar** | **Martian** |
| --- | --- | --- | --- | --- |
| SiO2 (%) | FUS-ICP | 0.01 | 49.56 | 42.98 |
| Al2O3 (%) | FUS-ICP | 0.01 | 25.59 | 13.33 |
| Fe2O3(T) (%) | FUS-ICP | 0.01 | 4.47 | **11.56** |
| MnO (%) | FUS-ICP | 0.005 | 0.071 | 0.121 |
| MgO (%) | FUS-ICP | 0.01 | 3.18 | **13.64** |
| CaO (%) | FUS-ICP | 0.01 | 13.03 | 8.08 |
| Na2O (%) | FUS-ICP | 0.01 | 2.91 | 1.77 |
| K2O (%) | FUS-ICP | 0.01 | 0.49 | 0.39 |
| TiO2 (%) | FUS-ICP | 0.001 | 0.655 | 0.621 |
| P2O5 (%) | FUS-ICP | 0.01 | 0.21 | 0.23 |
| Sc (ppm) | FUS-ICP | 1 | 10 | 16 |
| V (ppm) | FUS-ICP | 5 | 86 | 117 |
| Ba (ppm) | FUS-ICP | 2 | 332 | 334 |
| Sr (ppm) | FUS-ICP | 2 | 438 | 386 |
| Zr (ppm) | FUS-ICP | 2 | 60 | 59 |
| Cr (ppm) | FUS-MS | 20 | 130 | **1090** |
| Co (ppm) | FUS-MS | 1 | 17 | 43 |
| Ni (ppm) | FUS-MS | 20 | 60 | **450** |
| Cu (ppm) | FUS-MS | 10 | 20 | 30 |
| Zn (ppm) | FUS-MS | 30 | 40 | 50 |
| Ga (ppm) | FUS-MS | 1 | 19 | 12 |
| Nb (ppm) | FUS-MS | 1 | 14 | 15 |
| La (ppm) | FUS-MS | 0.1 | 16.7 | 17.5 |
| Ce (ppm) | FUS-MS | 0.1 | 31.7 | 35.4 |
| Nd (ppm) | FUS-MS | 0.1 | 14 | 16.3 |

**Supplementary Table 2:** *Maize leaf tissue elemental analysis collected by Kansas State Soil Testing Lab for Experiment 2.*

| **Maize Substrate** | **Total N %** | **Total C %** | **C/N** | **P %** | **N/P** | **K %** | **Ca %** | **Mg %** | **SO4-S %** | **Cu ppm** | **Fe ppm** | **Mn ppm** | **Zn ppm** |
| --- | --- | --- | --- | --- | --- | --- | --- | --- | --- | --- | --- | --- | --- |
| 01 Martian AMF Biosolid | 3.13 | 42.59 | 13.607 | 0.147 | 21.29 | 1.58 | 0.371 | 1.160 | 0.542 | 10.8 | 191.7 | 134.6 | 29.2 |
| 01 Martian AMF UreaN | 2.60 | 42.32 | 16.277 | 0.116 | 22.41 | 0.97 | 0.999 | 1.044 | 0.315 | 9.0 | 1,281.9 | 48.7 | 11.6 |
| 02 Martian AMF UreaN |  |  |  | 0.156 |  | 1.06 | 0.862 | 1.138 | 0.546 | 10.1 | 484.0 | 120.3 | 16.0 |
| 03 Martian AMF UreaN | 2.92 | 42.47 | 14.545 | 0.170 | 17.18 | 0.91 | 0.878 | 1.301 | 0.417 | 12.3 | 850.9 | 64.1 | 15.9 |
| 01 Martian Sterile UreaN |  |  |  | 0.077 |  | 1.36 | 2.529 | 1.905 | 2.075 | 7.1 | 5,892.3 | 90.1 | 14.7 |
| 01 Lunar AMF Biosolid | 2.51 | 42.16 | 16.797 | 0.092 | 27.28 | 1.30 | 1.541 | 0.382 | 0.188 | 12.0 | 193.0 | 178.1 | 25.4 |
| 02 Lunar AMF Biosolid | 2.72 | 41.86 | 15.390 | 0.140 | 19.43 | 0.97 | 2.091 | 0.551 | 0.194 | 8.7 | 122.6 | 220.9 | 19.5 |
| 03 Lunar AMF Biosolid | 2.64 | 42.59 | 16.133 | 0.116 | 22.76 | 0.85 | 2.121 | 0.715 | 0.205 | 8.5 | 134.6 | 223.8 | 21.8 |
| 04 Lunar AMF Biosolid | 2.53 | 41.82 | 16.530 | 0.098 | 25.82 | 0.90 | 2.278 | 0.582 | 0.183 | 8.8 | 123.5 | 267.5 | 36.2 |
| 01 Lunar Sterile Biosolid | 2.88 | 42.23 | 14.663 | 0.131 | 21.98 | 1.11 | 1.737 | 0.609 | 0.251 | 14.5 | 198.9 | 116.1 | 17.5 |
| 02 Lunar Sterile Biosolid | 2.01 | 41.58 | 20.687 | 0.088 | 22.84 | 0.81 | 1.559 | 0.649 | 0.167 | 7.3 | 99.6 | 93.9 | 10.5 |
| 01 Lunar AMF UreaN | 2.47 | 39.83 | 16.126 | 0.124 | 19.92 | 0.84 | 0.866 | 0.535 | 0.039 | 5.3 | 174.7 | 47.4 | 6.7 |
| 02 Lunar AMF UreaN | 1.37 | 40.85 | 29.818 | 0.107 | 12.80 | 1.41 | 1.364 | 0.567 | 0.098 | 14.2 | 512.0 | 37.2 | 11.4 |
| 03 Lunar AMF UreaN | 2.52 | 39.50 | 15.675 | 0.105 | 24.00 | 0.76 | 1.255 | 0.636 | 0.043 | 10.1 | 125.9 | 44.8 | 12.5 |
| 04 Lunar AMF UreaN | 3.55 | 40.87 | 11.513 | 0.148 | 23.99 | 0.55 | 0.749 | 0.512 | 0.102 | 31.6 | 32.8 | 62.4 | 14.5 |
| 05 Lunar AMF UreaN | 1.94 | 40.90 | 21.082 | 0.101 | 19.21 | 0.79 | 0.994 | 0.604 | 0.041 | 11.5 | 66.6 | 65.5 | 5.2 |
| 01 Lunar Sterile UreaN |  |  |  | 0.050 |  | 1.02 | 1.505 | 0.645 | 0.084 | 22.1 | 470.8 | 100.9 | 7.3 |
| 02 Lunar Sterile UreaN | 0.82 | 39.89 | 48.646 | 0.049 | 16.73 | 1.32 | 1.427 | 0.621 | 0.059 | 8.8 | 114.0 | 110.9 | 4.3 |
| 03 Lunar Sterile UreaN |  |  |  | 0.306 |  | 1.80 | 1.357 | 0.457 | 0.111 | 19.7 | 178.0 | 92.8 | 18.5 |
| 04 Lunar Sterile UreaN |  |  |  | 0.058 |  | 1.63 | 1.411 | 0.475 | 0.048 | 16.8 | 327.3 | 106.0 | 6.4 |

| 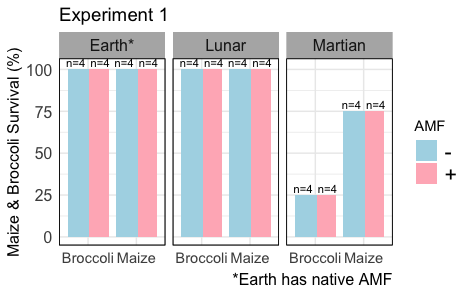 | 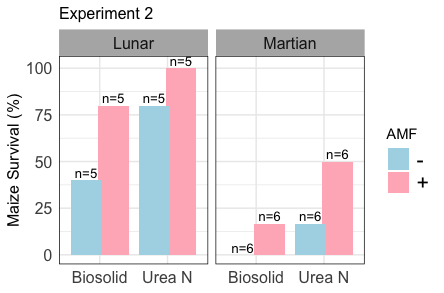 |
| --- | --- |
| 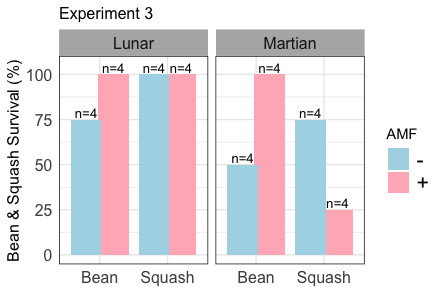 | 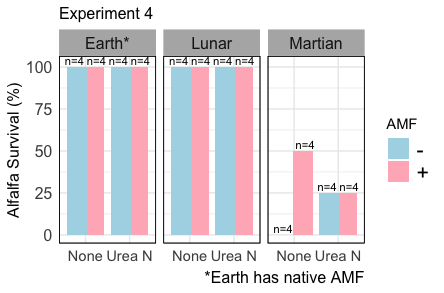 |

**Supplementary Figure 1:** *Survival rates of broccoli and maize grown in* ***Experiment 1****, maize grown in* ***Experiment 2****, bean and squash grown in* ***Experiment 3****, and alfalfa grown in* ***Experiment 4****. Pink bars indicate plants inoculated with AM fungi (+AMF) and blue bars are inoculated with dead AM Fungi (-AMF) and n indicates the number of starting biological replicates in each treatment. Lunar soil yielded high survivorship with the exceptions of Experiment 3, which had 25% mortality in -AMF bean plants, and in experiment 2 wherein the only Lunar soil treatment with 100% survival was Urea with live +AMF inoculation. Martian soil had the lowest survivorship across experiments and the only treatment with 100% survival were the live +AMF bean plants. Earth soil had 100% survival without exception (Experiments 1 and 4).*

**Supplementary Table 3:** *Statistical models with their respective extreme values for Experiments 1-4.*

| Experiment 1 Statistics: model(Response ~ AMF) | | |
| --- | --- | --- |
| Response | Model Details | Extreme Values |
| Biomass (Lunar Corn) | GLS (Variance Factor = None) | Plant 36: +AMF |
| Biomass (Lunar Broccoli) | GLS (Variance Factor = None) |  |
| Biomass (Martian Corn) | GLS (Variance Factor = None) |  |
| Colonization (Martian Corn) | GLS (Variance Factor = None) |  |
| Experiment 2 Statistics: model(Response ~ Fertilizer * AMF) | | |
| Biomass | GLS (Variance Factor = AMF) | Plant 36: Urea +AMF |
| Yield | GLS (Variance Factor = Fertilizer x AMF) |  |
| RPC | GLS (Variance Factor = None) | Plant 28: Biosolid +AMF |
| P% | GLS (Variance Factor = AMF) | Plant 43: Urea -AMF |
| N% | LM - only +AMF data | Plant 38: Urea +AMF |
| N/P | LM - only +AMF data |  |
| C/N | LM - only +AMF data | Plant 42: Urea -AMF  Plant 34: Biosolid -AMF |
| SPAD | GLS (Weight = None) | Plant 25: Biosolid +AMF |
| Ca % | GLS (Weight = AMF) |  |
| K % | LM |  |
| Mg % | GLM (Family = Gaussian) | Plant 25: Biosolid +AMG |
| SO4S % | GLM (Family = Gaussian) | Plant 31: Biosolid -AMF |
| Cu ppm | GLM (Family = Gamma) |  |
| log(Fe ppm) | LM |  |
| Mn ppm | GLS (Weight = Fertilizer) |  |
| Zn ppm | LM | Plant 29: Biosolid +AMF |
| Electroconductivity  (Fertilizer * Regolith) | GLS (Weight = Regolith) |  |
| Experiment 3 Statistics: model(Response ~ AMF) | | |
| Shoot Weight (Lunar Bean) | GLM (Family = Gaussian) |  |
| Shoot Weight (Lunar Squash) | LM |  |
| Shoot Weight (Martian Bean) | LM |  |
| Fruit Weight (Lunar Bean) | LM |  |
| Fruit Weight (Martian Bean) | LM |  |
| SPAD (Lunar Bean) | LM | Plant 2: +AMF |
| SPAD (Lunar Squash) | LM | Plant 13: -AMF |
| SPAD (Martian Bean) | LM |  |
| Root % Colonized (Lunar Bean) | GLS (Variance Factor = AMF) | Plant 3: +AMF |
| Root % Colonized (Lunar Squash) | GLS (Variance Factor = AMF) | Plant 13: -AMF |
| Nodule Count (Lunar Bean) | GLS (Variance Factor = AMF) |  |
| Nodule Count (Martian Bean) | GLS (Variance Factor = AMF) |  |
| Experiment 4 Statistics: model(Response ~ Fertilizer * AMF) | | |
| Biomass | LM |  |
| Nodule Count | LM |  |
| Colonization | LM | Plant 43: +AMF +Urea  Plant 51: +AMF -Urea  Plant 56: -AMF -Urea |

**Supplementary Table 4:** *Statistical models for Experiments 1-4 and the significance of fertilizer (F), AMF (A), the fertilizer x AMF interaction (FxA), or regolith (R). For LMs F- and p-values are provided to show significance. For GLS models and p-values are provided for significance. For GLM models, linear regression (LR) and p-values are provided for significance. Statistically significant results are bolded.*

| Response | Model Details | AMF Significance |
| --- | --- | --- |
| Experiment 1 Statistics: model(Response ~ AMF) | | |
| Biomass (Lunar Corn) | GLS (Variance Factor = None) | (1) = 0.004, p = 0.951 |
| Biomass (Lunar Broccoli) | GLS (Variance Factor = None) | (1) = 0.281, p = 0.596 |
| Biomass (Martian Corn) | GLS (Variance Factor = None) | **(1) = 3.619, p = 0.0571** |
| Colonization (Martian Corn) | GLS (Variance Factor = None) | **(1) = 25, p = 5.73e-7** |
| Experiment 2 Lunar Statistics: model(Response ~ Fertilizer * AMF)  Independent variables: Fert=Fertilizer, A=AMF, FxA = Fertilizer*AMF interaction | | |
| Biomass | GLS (Variance Factor = AMF) | **Fert: (1) = 6.54, p = 0.0105**  A: (1) = 1.70, p = 0.192  FxA: (1) = 92.9, p 0.078 |
| Yield | GLS (Variance Factor = Fertilizer x AMF) | **Fert: (1) = 92.9, p = 5.38e-22**  **A: (1) = 4.03, p = 0.0446**  **FxA: (1) = 4.04, p = 0.0442** |
| RPC | GLS (Variance Factor t = None) | Fert: (1) = 0.300, p = 0.584  **A: (1) = 1260, p = 7.82e-277**  **FxA: (1) = 445, p = 9.61e-99** |
| P% | GLS (Variance Factor = AMF) | Fert: (1) = 0.004, p = 0.948  A: (1) = 0.0005, p = 0.982  FxA: (1) = 6e-5, p = 0.994 |
| N% | LM - only +AMF data | Fert: F(1) = 0.311, p = 0.594 |
| N/P | LM - only +AMF data | Fert: F(1) = 1.90, p = 0.211 |
| C/N | LM - only +AMF data | Fert: F(1) = 0.544, p = 0.485 |
| SPAD | GLS (Variance Factor = None) | **Fert: (1) = 9.69, p = 0.0018**  A: (1) = 0.390, p = 0.532  FxA: (1) = 0.105, p = 0.745 |
| Ca % | GLS (Variance Factor = AMF) | **Fert: (1) = 9.80, p = 0.0017**  **A: (1) = 7.90, p = 0.0049**  **FxA: (1) = 12.9, p = 0.0003** |
| K % | LM | **Fert: F(1) = 3.64, p = 0.083**  **A: F(1) = 8.54, p = 0.014**  **FxA: F(1) = 3.72, p = 0.080** |
| Mg % | GLM (Family = Gaussian) | Fert: LR (1) = 0.390, p = 0.532  A: LR (1) = 0.785, p = 0.375  FxA: LR (1) = 0.827, p = 0.363 |
| SO4S % | GLM (Family = Gaussian) | **Fert: LR (1) = 25.3, p = 5.03e-7**  A: LR (1) = 0.280, p = 0.596  FxA: LR (1) = 0.027, p = 0.868 |
| Cu ppm | GLM (Family = Gamma) | Fert: LR (1) = 1.02, p = 0.312  A: LR (1) = 0.207, p = 0.649  FxA: LR (1) = 0.008, p = 0.928 |
| log(Fe ppm) | LM | Fert: F(1) = 0.675, p = 0.429  A: F(1) = 1.94, p = 0.191  FxA: F(1) = 0.727, p = 0.412 |
| Mn ppm | GLS (Variance Factor = Fertilizer) | Fert: (1) = 0.01, p = 0.921  **A: (1) = 53.6, p = 2.45e-13**  **FxA: (1) = 33.7, p = 6.43e-9** |
| Zn ppm | LM | Fert: F(1) = 0.935, p = 0.354  A: F(1) = 0.057, p = 0.815  FxA: F(1) = 2.86, p = 0.118 |
| Electroconductivity  (Ind. Variable = Regolith) | GLS (Variance Factor = Regolith) | Regolith: (1) = 0.01, p = 0.921 |
| Experiment 3 Statistics: model(Response ~ AMF) | | |
| Shoot Weight (Lunar Bean) | GLM (Family = Gaussian) | A: LR (1) = 1.97, p = 0.160 |
| Shoot Weight (Martian Bean) | LM | A: F(1) = 1.03, p = 0.366 |
| Fruit Weight (Lunar Bean) | LM | **A: F(1) = 12.2, p = 0.017** |
| Fruit Weight (Martian Bean) | LM | A: F(1) = 0.232, p = 0.655 |
| SPAD (Lunar Bean) | LM | A: F(1) = 1.05, p = 0.352 |
| SPAD (Lunar Squash) | LM | A: F(1) = 0.829, p = 0.397 |
| SPAD (Martian Bean) | LM | **A: F(1) = 5.39, p = 0.081** |
| Root % Colonized (Lunar Bean) | GLS (Variance Factor = AMF) | **A: (1) = 4.59, p = 0.032** |
| Root % Colonized (Lunar Squash) | GLS (Variance Factor = AMF) | **A: (1) = 32.7, p = 1.09e-8** |
| Nodule Count (Lunar Bean) | GLS (Variance Factor = AMF) | **A: (1) = 5.01 p = 0.025** |
| Nodule Count (Martian Bean) | GLS (Variance Factor = AMF) | **A: (1) = 9.51, p = 0.002** |
| Experiment 4 Lunar Statistics: model(Response ~ Fertilizer * AMF)  Independent variables: Fert=Fertilizer, A=AMF, FxA = Fertilizer*AMF interaction | | |
| Biomass | LM | **Fert: F(1) = 4.15, p = 0.064**  A: F(1) = 0.937, p = 0.352  **FxA: F(1) = 5.82, p = 0.033** |
| Nodule Count | GLM | Fert: LR (1) = 14.08, p = 0.0002  A: LR (1) = 7.36, p = 0.0066  FxA: LR (1) = 8.85, p = 0.0029 |
| Colonization | LM | **Fert: F(1) = 6.00, p = 0.031**  **A: F(1) = 42.7, p = 2.8e-5**  FxA: F(1) = 3.00, p = 0.109 |
